# Supplementary material for: Twice-walk strategy based on three-dimensional DNA walking machine driven by duplex-specific nuclease
Source: Royal Society of Chemistry journal article supplement (doi:10.1039/d3cc06058f), 2024-01-01
Supplement: d3cc06058f1.pdf [file d3cc06058f1.pdf]

1  
2  
3  
4  
5  
6  
7  
8  
9  
10  
11  
12  
13  
14  
15  
16  
17  
18  
19  
20  
21  
22

*Supporting Information for Publication*

**Twice-walking strategy based on three-dimensional DNA walking machine driven  
by duplex-specific nuclease**

Sheng Lei,<sup>a, e</sup> Zi Liu,<sup>b</sup> Qidong Zhang,<sup>a</sup> Zezhi Li,<sup>a, f</sup> Gaiping Li,<sup>c</sup> Lina Zou,<sup>c</sup> Guobi Chai,<sup>a</sup>  
Jian Mao,<sup>a, d</sup> Baoxian Ye,<sup>\*b</sup> Jianxun Zhang,<sup>\*a</sup>

<sup>a</sup>Zhengzhou Tobacco Research Institute of China National Tobacco Company,  
Zhengzhou 450001, P.R. China.

<sup>b</sup>Henan Key Laboratory of Biomolecular Recognition and Sensing, Henan Joint  
International Research Laboratory of Chemo/Biosensing and Early Diagnosis of Major  
Diseases, College of Chemistry and Chemical Engineering, Shangqiu Normal  
University, Shangqiu 476000, PR China.

<sup>c</sup>College of Chemistry, Zhengzhou University, Zhengzhou 450001, P.R. China.

<sup>d</sup>Beijing Life Science Academy, Beijing, 102299, P.R. China.

<sup>e</sup>College of Life Sciences, Nanjing Agricultural University, Nanjing 210095, P.R.  
China.

<sup>f</sup>School of Light Industry, Beijing Technology and Business University, Beijing  
100048, P.R. China.

23

24 **Table of contents**

25 1. Chemicals and materials

26 2. Experimental section

27 3. Sequences of the Oligonucleotides Employed in This Work

28 4. Instrumentation and measurement

29 5. Cell Culture, Total RNA Extraction, cDNA Synthesis and Quantitative Real-time

30 PCR

31 6. TEM image of Au NPs.

32 7. Polyacrylamide gel electrophoresis

33 8. Electrochemical characterizations of the proposed biosensor

34 9. Optimization of Experimental Conditions

35 10. Comparison of sensing strategy without cleat

36 11. Comparison of this Strategy with Other Studies

37 12. Investigation of Reproducibility.

38 13. Reference

39

40

41

42

43

44

45

46 1. Chemicals and materials

47 Duplex-specific nuclease (DSN), DSN Master Buffer (50 mM Tris-HCl, 5 mM  
48 MgCl<sub>2</sub>, 1 mM DTT, pH 8.0) and DSN stop solution (10 mM EDTA) were obtained  
49 from Evrogen Joint Stock Company (Moscow, Russia). Trisodium citrate dihydrate, 6-  
50 mercapto-1-hexanol (MCH), tris(2-carboxyethyl) phosphine hydrochloride (TCEP),  
51 gold (III) chloride trihydrate (HAuCl<sub>4</sub>·3H<sub>2</sub>O) and Tris-HCl were acquired from Sigma  
52 Chemical Co. (St. Louis, USA). Ultrapure water (specific resistance of 18.2 MΩ·cm)  
53 obtained from Thermo Scientific Barnstead GenPure water purification system  
54 (Thermo Fisher Scientific Co., Ltd, Shanghai, China) was used in the experimental  
55 processes. All DNA oligonucleotides (shown in Table S1) were produced by Takara  
56 Biomedical Technology Co. (Beijing, China).

57

58

59

60

61

62

63

64

65

66

67

## 68 2. Experimental section

### 69 2.1 Preparation of 3D cleat DNA walking machine.

70 AuNPs were synthesized according to literature, reducing  $\text{HAuCl}_4$  with sodium  
71 citrate (Fig. S1).<sup>1</sup> H1 were incubated with AuNPs in a molar ratio (H1&AuNPs) of 200.  
72 After blending in the shaker for 12 h (100 rpm), buffer 1 (100 mM  $\text{Na}_2\text{HPO}_4$ , 100 mM  
73  $\text{KH}_2\text{PO}_4$ , 1 M NaCl, pH 7.4) was added to the mixture to achieve a final concentration  
74 of 10 mM PB, and then shaken at 37 °C for 40 h. Finally, the compound was centrifuged  
75 (12000 rpm, 15 min), washed three times, and then dispersed in buffer 2 (10 mM  
76  $\text{Na}_2\text{HPO}_4$ , 10 mM  $\text{KH}_2\text{PO}_4$ , 0.1 M NaCl, pH 7.4) to obtain H1&AuNPs. The  
77 concentration of H1&AuNPs was calculated by the formula (Lambert-Beer).

### 78 2.2 Procedure of the Twice-walking Strategy for Electrochemical Detection of MiRNA

79 Fabrication of the electrochemical biosensor: The Au electrode (AuE, 3 mm in  
80 diameter) was successively polished with 0.05 and 0.3  $\mu\text{m}$  alumina and then sonicated  
81 for 4 min in water and ethanol by turns. They were then subjected to a series of  
82 electrochemical cleaning steps as described previously.<sup>2</sup> Afterwards, 5  $\mu\text{L}$  H2 (0.8  $\mu\text{M}$ )  
83 in TNaKT buffer (20 mM Tris, 140 mM NaCl, 5 mM KCl, 10 mM TCEP, pH 7.5) was  
84 dropped on AuE and incubated at 25 °C for 8 h. Then, the resulting AuE was allowed  
85 to incubate with 5  $\mu\text{L}$  of 1 mM MCH for 1 h to obtain the sensing interface. At each  
86 step above, the electrodes were slowly and carefully washed with clean buffer (20 mM  
87 Tris, 0.05 % Tween, pH 7.5) and Tris-HCl buffer (20 mM Tris, pH 7.5), respectively.

88 The 3D cleat DNA walking reaction: Different concentrations of target miRNA-

89 141 and DSN (0.01 U/ $\mu$ L) were added to the H1&AuNPs (1  $\mu$ M) and completely  
90 reacted at 37°C for 2 h in DSN Master Buffer.

91 The multi-legged walking reaction: 5  $\mu$ L of the mixed solution from previous step  
92 was introduced onto the modified electrode (MCH/H2/AuE) and incubated for 70 min  
93 at 37 °C.

94

95

96

97

98

99

100

101

102

103

104

105

106

107

108

109 3. Sequences of the Oligonucleotides Employed in This Work

110 Table S1 Sequences of the Oligonucleotides Employed in This Work

| Oligo Name | Sequence (5'→3')                                                 |
|------------|------------------------------------------------------------------|
| H1*        | SH-TTTTTTCGAGUGUCAGU <u>CCAUCUUU</u> ACCAGACAGTGTTACAGATGGAC-FAM |
| H1-D       | SH-TTTTTTCGAGTGCAGTCCATCTTTACCAGACAGTGTTACAGATGGAC-FAM           |
| H1         | SH-TTTTTTCGAGUGUCAGU <u>CCAUCUTT</u> ACCAGACAGTGTTACAGATGGAC     |
| W (5)      | GUAACACUGUCUGGU GAUGG                                            |
| W (6)      | GUAACACUGUCUGGU AGAUGG                                           |
| W (7)      | GUAACACUGUCUGGU AAGAUGG                                          |
| W (8)      | GUAACACUGUCUGGU AAAGAUGG                                         |
| H2         | SH-TTTTAGATGGACTGACACTCGCTATCAGACAGTGTTACGAGTGTCA-Fc             |
| mi-RNA-141 | UAACACUGUCUGGUAAAGAUGG                                           |
| One-base   | UAACACUGUC <u>A</u> GGUAAAGAUGG                                  |
| Two-base   | UAACAG <u>UG</u> UCUGGU <u>AU</u> AGAUGG                         |
| mi-RNA 21  | UAGCUUAUCAGACUGAUGUUGA                                           |

111

112

113

114

115

116

117

118

119

120

#### 121 4. Instrumentation and measurement

122 All the electrochemical analytical experiments were carried out on A CHI 650A  
123 electrochemical workstation (CH Instruments, Shanghai, China). The traditional three-  
124 electrode system included the Gold disk electrodes (AuE, 3 mm in diameter) as working  
125 electrode, platinum wire as auxiliary electrode and a saturated calomel electrode (SCE)  
126 as reference electrode. CV experiments were conducted in PBS (100 mM PB, 100 mM  
127 KCl, pH 7.4) containing 5 mM  $[\text{Fe}(\text{CN})_6]^{3-/4-}$  by scanning the potential between -0.2  
128 and 0.6 V with scan rate of  $50 \text{ mV}\cdot\text{s}^{-1}$ . DPV measurements were performed in PBS  
129 buffer (100 mM  $\text{Na}_2\text{HPO}_4$ , 100 mM  $\text{KH}_2\text{PO}_4$ , 100 mM KCl, 100 mM  $\text{NaClO}_4$ , pH 7.4)  
130 with potential from -0.05 to 0.5 V and pulse parameters of the pulse amplitude of 50mV,  
131 the sample width of 16.7 ms and the pulse width of 50 ms. Transmission electron  
132 microscopic (TEM) images were performed on a M3000 transmission electron  
133 microscope (FEI, USA). UV-Vis absorption spectra were carried out on a Lambda 35  
134 UV-Vis spectrometer (Beijing, China).

135

136

137

138

139

140

141

142

143 5. Cell Culture, Total RNA Extraction, cDNA Synthesis and Quantitative Real-time  
144 PCR

145 Human breast cancer cell line (MCF-7 cells) was purchased from the cell bank of  
146 the Chinese Academy of Sciences (Shanghai, China). Cells were cultured in DMEM  
147 medium (Thermo Scientific Co., Ltd, Shanghai, China) supplemented with 15% fetal  
148 bovine serum (FBS), penicillin 100 IU/ml, and streptomycin 100 µg/ml, at 37 °C in a  
149 95% humidified and 5% CO<sub>2</sub> cell incubator. Total RNA samples were extracted from  
150 the cells by using the Total RNA Isolation Kit (Beibei Biotechnology Co., Ltd, Henan,  
151 China) according to the manufacturer's procedures. The Mir-X miRNA First-Strand  
152 Synthesis Kit and the Mir-X miRNA qRT-PCR TB Green Kit (Takara Biomedical  
153 Technology Co., Ltd, Beijing, China) is used for converting miRNAs into cDNA and  
154 quantifying target miRNAs.

155

156

157

158

159

160

161

162

163



164

165 6. TEM image of Au NPs.

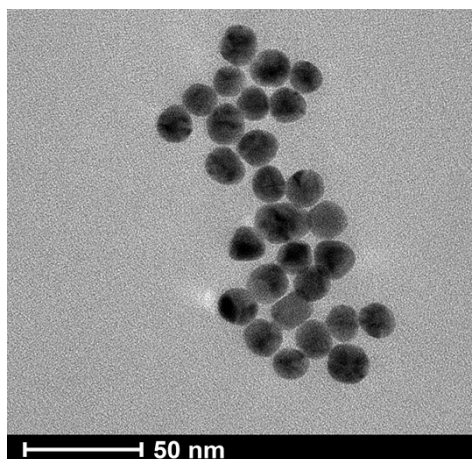

166

Fig. S1 TEM image of Au NPs.

167

168

169

170

171

172

173

174

175

176

177

178

179

180

## 181 7. Polyacrylamide gel electrophoresis

182 Polyacrylamide gel (PAGE) was prepared by adding 5 × Tris-boric acid (TBE)  
183 buffer, acrylamide (30%), tetramethylethylenediamine (TEMED) and ammonium persulfate  
184 (10%) solution in proportion to ultra-pure water. The DNA samples (1 μM) were  
185 annealed at 95 °C for 5 min and cooled to room temperature, then mixed well with 2  
186 μL of loading buffer and 2 μL of CYBER Gold, respectively, and then injected slowly  
187 into the 12% polyacrylamide gel through micro-syringe. The electrophoresis  
188 experiment was proceeded at 80 V constant voltage for 120 min and the gel image was  
189 visualized under UV light.

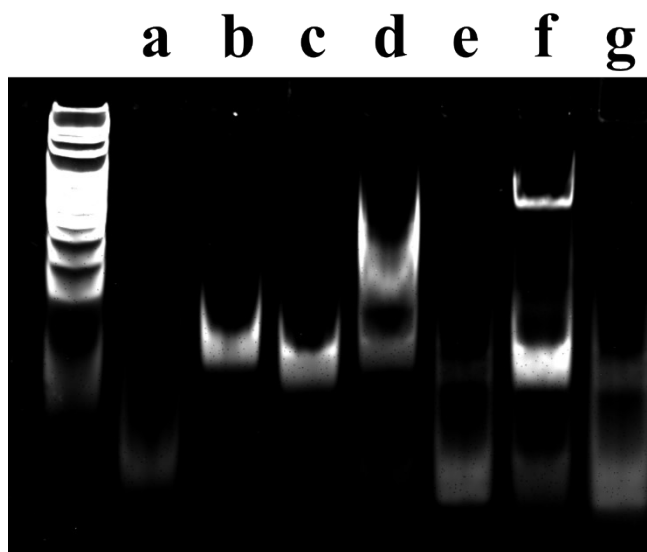

190

191 Figure S2. PAGE image of (a) miRNA, (b) H1, (c) H2, (d) miRNA + H1, (e) miRNA,  
192 + H1 + DSN, (f) solution (e) with DSN stop solution + H2, (g) solution (e) + H2.

193

194

195

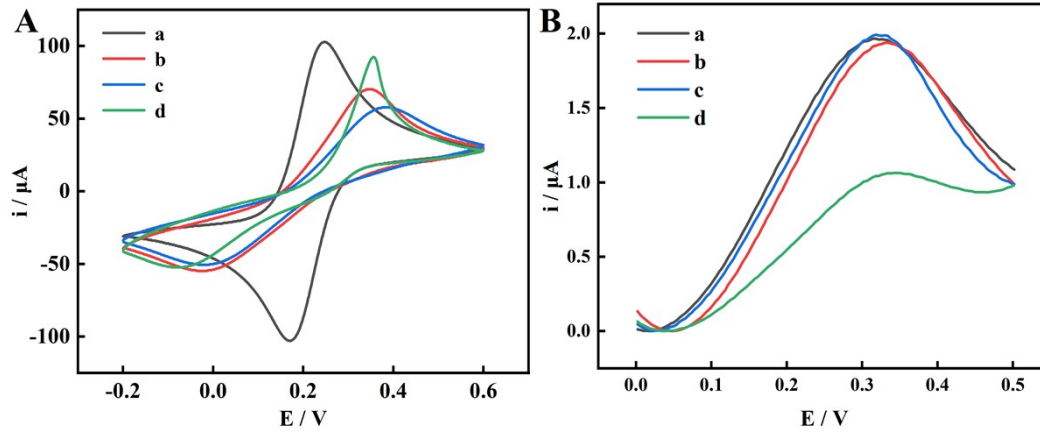

197 8. Electrochemical characterizations of the proposed biosensor

198 Fig. S3 (A) CV of different electrode in 0.1 M KCl solution containing 5 mM

199  $[\text{Fe}(\text{CN})_6]^{3-/4-}$ : (a) bare AuE, (b) H2/AuE, (c) MCH/H2/AuE, (d) after cleavage reaction

200 of DSN; (B) DPV responses of the MCH/H2/AuE after reaction with (a) no miRNA-

201 141 and DSN, (b) no DSN, (c) no miRNA and (d) 100 fM target and 0.01 U/ $\mu\text{L}$  DSN.

202

203

204

205

206

207

208

209

210

211

212

213 9. Optimization of Experimental Conditions

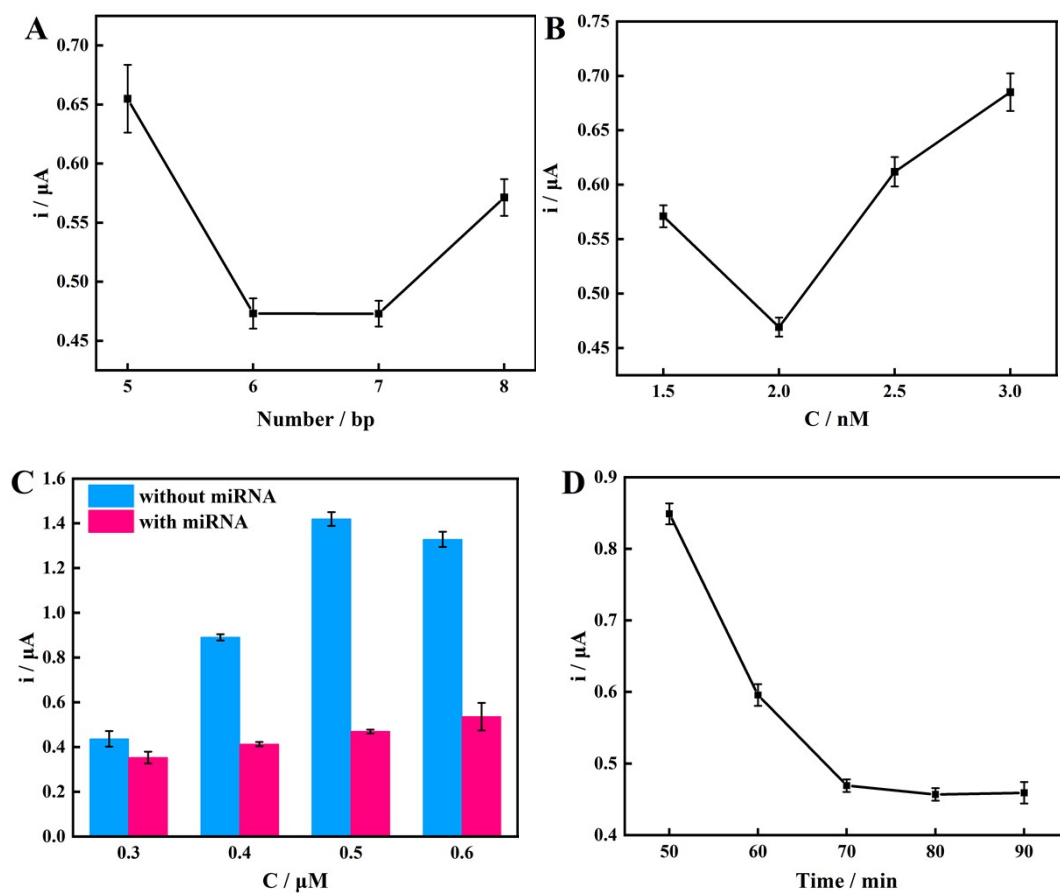

214 Fig. S4 (A) Effects of length of cleat structure in H1; (B) Effects of concentration of  
215 H1&AuNPs; (C) Effects of assembly concentration of H2; (D) Effects of multi-legged  
216 DNA walking reaction time, error bar, SD,  $n = 3$ .

217

218

219

220

221

222

223

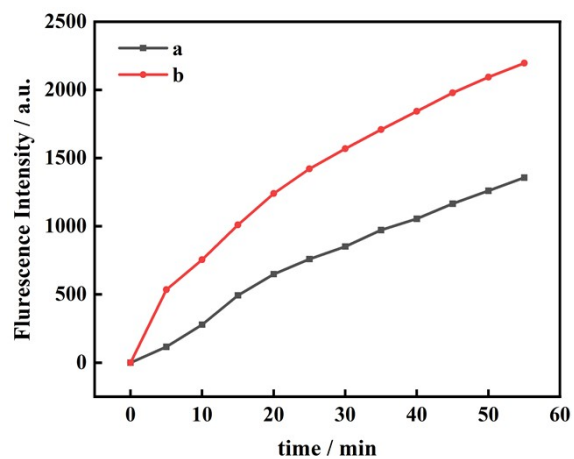

224 10. Comparison of sensing strategy without cleat

225 Fig. S5 Fluorescence analysis of (a) H1-D&AuNPs (without cleat) and (b)

226 H1\*&AuNPs (with cleat) after reaction with 50 fM W (6) and 0.01 U/ $\mu$ L DSN.

227

228

229

230

231

232

233

234

235

236

237

238

239

## 240 11. Comparison of this Strategy with Other Studies

241 Table S2. Comparison of this Strategy with Other Studies for Detection of miRNA.

| analytical strategy                                                       | step count | linear range     | LOD            | refs      |
|---------------------------------------------------------------------------|------------|------------------|----------------|-----------|
| Cleat-equipped molecular walking machine                                  | 1          | 0.5 fM to 5 pM   | 0.26 fM        | 3         |
| Molecular machine based on toehold-mediated strand displacement reactions | 1          | 5 fM to 500 pM   | 1.4 fM         | 4         |
| Bipedal DNA walker                                                        | 1          | 1 fM to 100 fM   | 0.22 fM        | 5         |
| DNA rolling machine                                                       | 1          | 1 fM to 100 pM   | 0.28 fM        | 6         |
| Controllable 3D DNA nanomachine                                           | 2          | 100 aM to 1 nM   | <b>33.1 aM</b> | 7         |
| Multipedal DNA walking nanomachine driven                                 | 2          | 10 aM to 1 pM    | <b>2.8 aM</b>  | 8         |
| Twice-walking strategy                                                    | 2          | 0.1 fM to 200 fM | <b>68 aM</b>   | this work |

242

243

244

245

246

247

248

249

250

251

252 12. Investigation of Reproducibility.

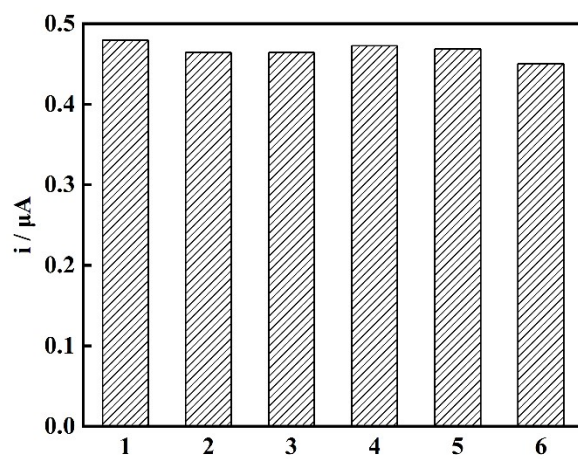

253

254 Fig. S6 Reproducibility of the proposed biosensor with six electrodes (50 fM miRNA-

255 141).

256

257

258

259

260

261

262

263

264

265

266

267

268

269

270 **Reference**

271 1. L. Xu, S. Lei, Z. Liu, G. Ouyang, L. Zou and B. Ye, *Anal. Chim. Acta.*, 2019, **1087**,

272 29-35.

273 2. S. Lei, L. Xu, Z. Liu, L. Zou, G. Li and B. Ye, *Anal. Chim. Acta.*, 2019, **1081**,

274 59-64.

275 3. S. Lei, Y. Ji, Q. Zhang, G. Li, L. Zou, G. Chai, J. Mao, J. Zhang, and B. Ye, *Tal.*,

276 2024, **272**, 125756.

277 4. K. Shi, B. Dou, C. Yang, Y. Chai, R. Yuan, and Y. Xiang, *Anal. Chem.*, 2015, **87**,

278 8578-8583.

279 5. Hua Chai, and Peng Miao, *Anal. Chem.*, 2019, **91**, 4953-4957.

280 6. Z. Xu, Y. Chang, Y. Chai, and H. Wang, and Ruo Yuan, *Anal. Chem.*, 2019, **91**,

281 4843-4888.

282 7. D. Li, X. Zhang, Y. Chai, and R. Yuan, *Anal. Chem.*, 2023, **95**, 1490-1497.

283 8. P. Miao, *Anal. Chem.*, 2023, **95**, 6760-6764.
